# Supplementary material for: Radiomics-Based Machine Learning Model for Predicting Overall and Progression-Free Survival in Rare Cancer: A Case Study for Primary CNS Lymphoma Patients
Source: MDPI journal article supplement (doi:10.3390/bioengineering10030285), 2023-02-22
Supplement: s1 [file s1]

**Table S1.**

The SoA of Radiomics Analysis about PCNSL tumor.

| <b>Title</b>                                                                                                                                                                      | <b>DOI</b>                                                                                          | <b>Patients</b>                            | <b>Data Augmentation</b> | <b>Aim</b>                                                                                                                                                                                                                                                          | <b>Tumor Type</b>    | <b>Pre-processing Image / Normalize Image method</b> |
|-----------------------------------------------------------------------------------------------------------------------------------------------------------------------------------|-----------------------------------------------------------------------------------------------------|--------------------------------------------|--------------------------|---------------------------------------------------------------------------------------------------------------------------------------------------------------------------------------------------------------------------------------------------------------------|----------------------|------------------------------------------------------|
| Diffusion radiomics as a diagnostic model for atypical manifestation of primary central nervous system lymphoma: development and multicenter external validation                  | <a href="https://doi.org/10.1093/neuonc/noy021">https://doi.org/10.1093/neuonc/noy021</a>           | 112 patients (70 glioblastoma/ 42 PCNSL)   | NO                       | To evaluate technical feasibility, diagnostic performance, and generalizability of a diffusion radiomics model for identifying atypical primary central nervous system lymphoma (PCNSL) mimicking glioblastoma.                                                     | PCNSL/ GLIOBL ASTOMA | Yes WhiteStripe                                      |
| Comparison of Radiomics-Based Machine-Learning Classifiers in Diagnosis of Glioblastoma From Primary Central Nervous System Lymphoma                                              | <a href="https://doi.org/10.3389/fonc.2020.01151">https://doi.org/10.3389/fonc.2020.01151</a>       | 138 patients (76 glioblastoma, 62 PCNSL)   | NO                       | To evaluate the ability of magnetic resonance (MR) radiomics-based machine learning algorithms in differentiating glioblastoma (GBM) from primary central nervous system Lymphoma (PCNSL).                                                                          | PCNSL/ GLIOBL ASTOMA | NO                                                   |
| Multiparametric-MRI-Based Radiomics Model for Differentiating Primary Central Nervous System Lymphoma From Glioblastoma: Development and Cross-Vendor Validation                  | <a href="https://doi.org/10.1002/jmri.27344">https://doi.org/10.1002/jmri.27344</a>                 | 240 patients (129 glioblastoma/ 111 PCNSL) | NO                       | To validate the generalization ability of radiomics models based on multiparametric-MRI (MP-MRI) for differentiating PCNSL from GBM.                                                                                                                                | PCNSL/ GLIOBL ASTOMA | Yes Zscore                                           |
| Radiomic features and multilayer perceptron network classifier: a robust MRI classification strategy for distinguishing glioblastoma from primary central nervous system lymphoma | <a href="https://doi.org/10.1038/s41598-019-42276-w">https://doi.org/10.1038/s41598-019-42276-w</a> | 123 patients (73 glioblastoma/ 50 PCNSL)   | NO                       | to establish a high-performing and robust classification strategy, using magnetic resonance imaging (MRI), along with combinations of feature extraction and selection in human and machine learning using radiomics or deep features by employing a small dataset. | PCNSL/ GLIOBL ASTOMA | Yes WhiteStripe                                      |

|                                                                                                                                                                                   |                                                                                                   |                                          |    |                                                                                                                                                                                                                                                                            |                      |                                  |
|-----------------------------------------------------------------------------------------------------------------------------------------------------------------------------------|---------------------------------------------------------------------------------------------------|------------------------------------------|----|----------------------------------------------------------------------------------------------------------------------------------------------------------------------------------------------------------------------------------------------------------------------------|----------------------|----------------------------------|
| Contrast-Enhanced MRI Texture Parameters as Potential Prognostic Factors for Primary Central Nervous System Lymphoma Patients Receiving High-Dose Methotrexate-Based Chemotherapy | <a href="https://doi.org/10.1155/2019/5481491">https://doi.org/10.1155/2019/5481491</a>           | 52 patients (PCNSL)                      | NO | to evaluate the prognostic value of texture features on contrast-enhanced magnetic resonance imaging (MRI) for patients with primary central nervous system lymphoma (PCNSL).                                                                                              | PCNSL                | NO                               |
| Classification of Primary Cerebral Lymphoma and Glioblastoma Featuring Dynamic Susceptibility Contrast and Apparent Diffusion Coefficient                                         | 10.3390/brainsci10110886                                                                          | 74 patients (37 glioblastoma/ 37 PCNSL)  | NO | to differentiate primary central nervous system lymphoma (PCNSL) and glioblastoma (GBM) via multimodal MRI featuring radiomic analysis.                                                                                                                                    | PCNSL/ GLIOBL ASTOMA | Yes<br>Not cited                 |
| Comparison between Glioblastoma and Primary Central Nervous System Lymphoma Using MR Image-based Texture Analysis                                                                 | 10.2463/mrms.m.p.2017-0044                                                                        | 60 patients (44 glioblastoma/ 16 PCNSL)  | NO | To elucidate differences between glioblastoma (GBM) and primary central nervous system lymphoma (PCNSL) with MR image-based texture features.                                                                                                                              | PCNSL/ GLIOBL ASTOMA | Yes<br>Intensity Standardization |
| Radiomics features to distinguish glioblastoma from primary central nervous system lymphoma on multi-parametric MRI                                                               | <a href="https://doi.org/10.1007/s00234-018-2091-4">https://doi.org/10.1007/s00234-018-2091-4</a> | 143 Patients (78 glioblastoma/ 65 PCNSL) | NO | To determine the feasibility of using high dimensional computer-extracted features, known as radiomics features, in differentiating primary central nervous system lymphoma (PCNSL) from glioblastoma on multi-parametric MR imaging including diffusion-weighted imaging. | PCNSL/ GLIOBL ASTOMA | NO                               |
| A Radiomic Machine Learning Model to Predict Treatment Response to Methotrexate and Survival Outcomes in Primary Central Nervous System Lymphoma (PCNSL)                          | <a href="https://doi.org/10.1182/blood-2020-141941">https://doi.org/10.1182/blood-2020-141941</a> | 47 Patients (PCNSL)                      | NO | To hypothesize that machine learning model using advanced magnetic resonance imaging (MRI) tumor characteristics will improve the accuracy of clinical models to predict response to MTX and survival outcomes.                                                            | PCNSL                | NO                               |

**Table S2.** The scanner characteristics for groups of patients examined (All scanners are 1.5 T). For each groups of scanner were reported the Ripetition Time (TR), Echo Time (TE), and Flip Angle (FA) for both sequences T1-W and T2-W.

|                                      | Manufacturer           | Model            | TR - T1-W | TR -T2-W  | TE - T1-W | TE -T2-W | FA - T1-W | FA - T2-W |
|--------------------------------------|------------------------|------------------|-----------|-----------|-----------|----------|-----------|-----------|
| <b>Group A</b>                       |                        |                  |           |           |           |          |           |           |
| 23                                   | Philips medical system | Achieva          | 450-650   | 4400-6230 | 12-15     | 100-120  | 69-75     | 90        |
| 14                                   | Philips medical system | AchievaStream    | 579-580   | 4445-4859 | 12        | 100      | 69        | 90        |
| 14                                   | Philips medical system | Intera           | 595-600   | 3000-4438 | 10-15     | 80-100   | 69        | 90        |
| 3                                    | GE medical system      | Signa HDx        | 510-520   | 5665      | 12        | 116      | 80        | 90        |
| 1                                    | Philips medical system | Ingenia          | 450       | 3527      | 15        | 100      | 69        | 90        |
| 1                                    | SIEMENS                | MAGNETOM AERA    | 358       | 5060      | 8.9       | 107      | 90        | 150       |
| <b>Group A2</b>                      |                        |                  |           |           |           |          |           |           |
| 19                                   | Philips medical system | Achieva          | 450-650   | 4400-6230 | 12-15     | 100-120  | 69-75     | 90        |
| 11                                   | Philips medical system | AchievaStream    | 580       | 4445-4859 | 12        | 100      | 69        | 90        |
| 12                                   | Philips medical system | Intera           | 595-600   | 3000-4400 | 10-15     | 80-100   | 69        | 90        |
| 3                                    | GE medical system      | Signa HDx        | 520       | 5665      | 12        | 116      | 80        | 90        |
| 1                                    | Philips medical system | Ingenia          | 450       | 3527      | 15        | 100      | 69        | 90        |
| 1                                    | SIEMENS                | MAGNETOM AERA    | 358       | 5060      | 8.9       | 107      | 90        | 150       |
| <b>Group A1 (First acquisition)</b>  |                        |                  |           |           |           |          |           |           |
| 7                                    | Philips medical system | Achieva          | 349-623   | 3633-6446 | 12-15     | 100-120  | 69-72     | 90        |
| 4                                    | Philips medical system | Ingenia          | 450-2060  | 3527-6211 | 15-20     | 100-110  | 69-90     | 90        |
| 3                                    | Philips medical system | AchievaStream    | 579-580   | 4454-4859 | 12        | 100      | 69        | 90        |
| 2                                    | Philips medical system | Intera           | 595-2000  | 3000-6446 | 10-15     | 85-100   | 69-90     | 90        |
| 2                                    | GE Medical System      | Dyscovery MR 450 | 300-480   | 7970-8635 | 20        | 97-98    | 90        | 160       |
| 1                                    | GE medical system      | Signa HDx        | 520       | 5665      | 12        | 116      | 80        | 90        |
| 3                                    | SIEMENS                | MAGNETOM AERA    | 11-584    | 4000-5000 | 7.16-8.9  | 92-99    | 15-90     | 125-150   |
| 1                                    | SIEMENS                | MAGNETOM ESSENZA | 2000      | 4000      | 9.1       | 99       | 150       | 150       |
| <b>Group A1 (Second acquisition)</b> |                        |                  |           |           |           |          |           |           |
| 13                                   | Philips medical system | Achieva          | 450-650   | 4409-6225 | 12-15     | 100      | 69-75     | 90        |
| 7                                    | Philips medical system | AchievaStream    | 579       | 4446-4859 | 12        | 100      | 69        | 90        |
| 1                                    | Philips medical system | Intera           | 599       | 4438      | 15        | 100      | 69        | 90        |
| 1                                    | SIEMENS                | Avanto fit       | 373       | 5500      | 8.4       | 110      | 90        | 150       |
| 1                                    | SIEMENS                | MAGNETOM AERA    | 358       | 5060      | 8.9       | 107      | 90        | 150       |
| <b>Group A1 (Third acquisition)</b>  |                        |                  |           |           |           |          |           |           |
| 10                                   | Philips medical system | Achieva          | 6.8-596   | 3003-4454 | 3.34-15   | 100      | 8-69      | 90        |
| 12                                   | Philips medical system | AchievaStream    | 579-588   | 4446-4859 | 12        | 100      | 69        | 90        |
| 1                                    | Philips medical system | Intera           | 599       | 4438      | 15        | 100      | 69        | 90        |
